# Supplementary material
Source: MDPI journal article supplement (https://www.mdpi.com/2076-3417/10/6/2150)
Supplement: s1 [file s1]

## Supplementary Material

# Anti-frothing effect of poultry feathers in bio-based, polycondensation-type thermoset composites

Markus Brenner <sup>1</sup>, Crisan Popescu <sup>2</sup> and Oliver Weichold <sup>1,\*</sup>

<sup>1</sup> Institute of Building Materials Research, Schinkelstraße 3, 52072 Aachen, Germany

<sup>2</sup> Kao European Research Laboratories, KAO Germany GmbH, Pfungstädter Str. 98–100, D-64297 Darmstadt, Germany

\* Correspondence: weichold@ibac.rwth-aachen.de

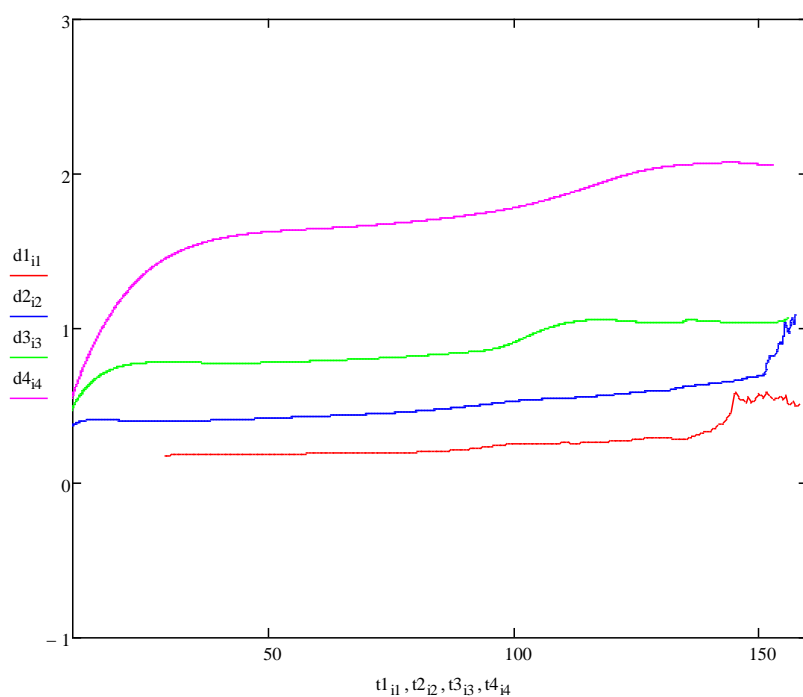

**Figure S1.** DSC trace of the reaction Cp1-1.

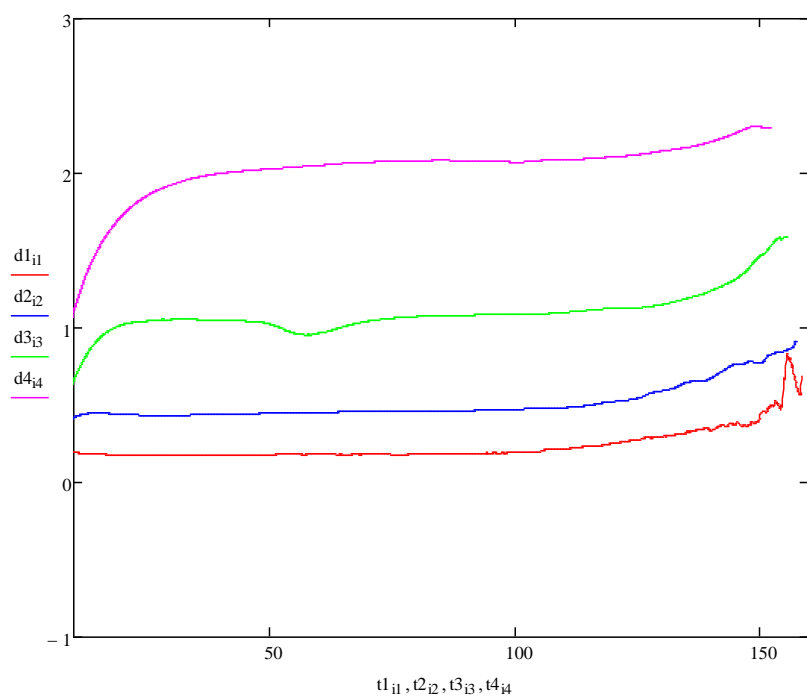

**Figure S2.** DSC trace of the reaction Cg1-1.

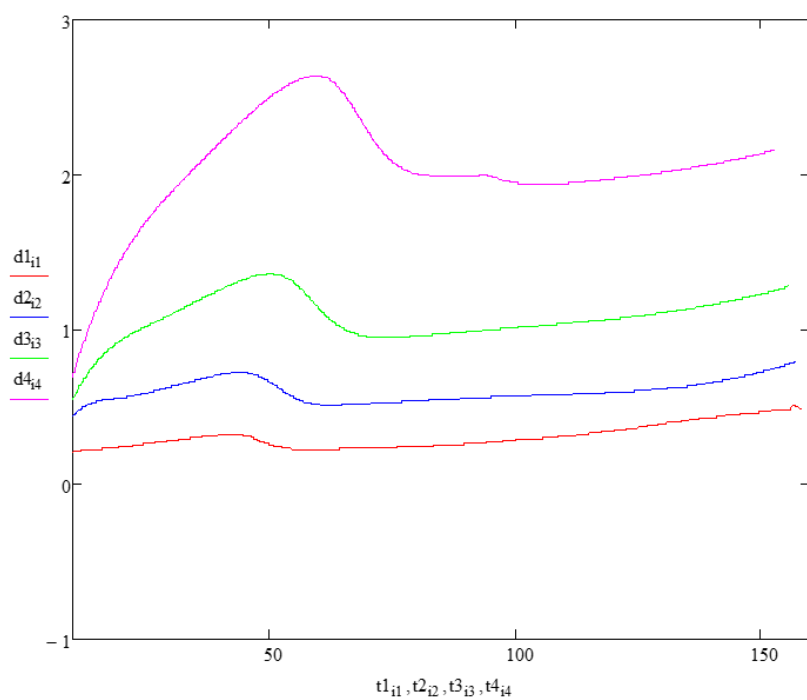

**Figure S3.** DSC trace of the reaction Gp1-1.

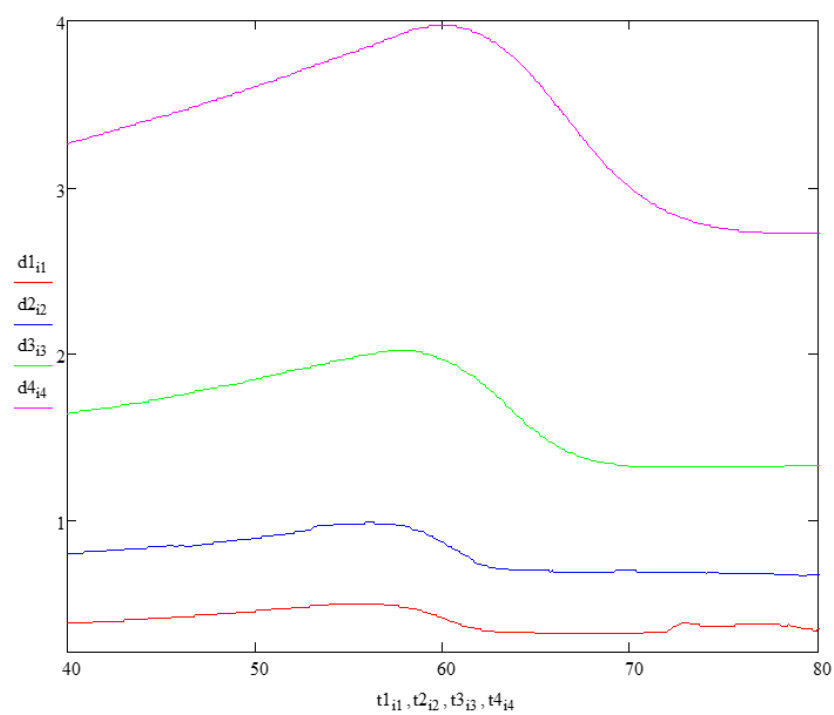

**Figure S4.** DSC trace of the reaction Gg1-1.

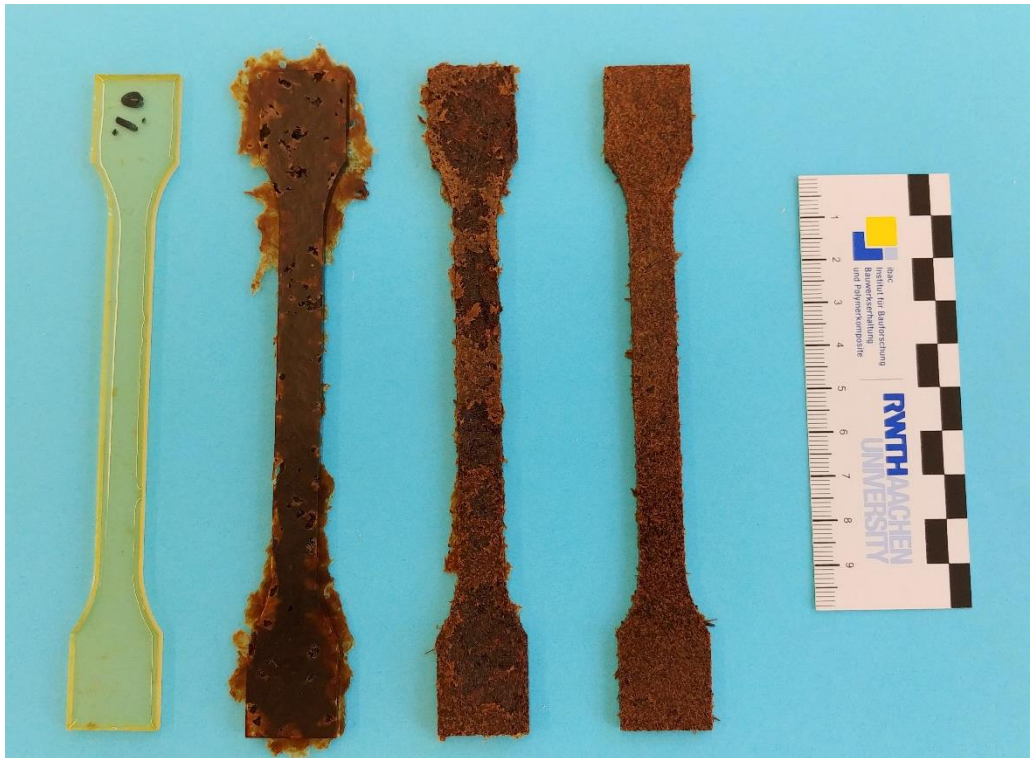

**Figure S5.** Optical appearance of the Gg1-1 specimen with increasing feather content. From left to right: 0 (Gg1-1), 5, 10, and 20 wt% (Gg1-1F). The first and the last sample are taken from a series that was used to assess the tensile properties (cf. Tab. F and Figs P, S6, S7).

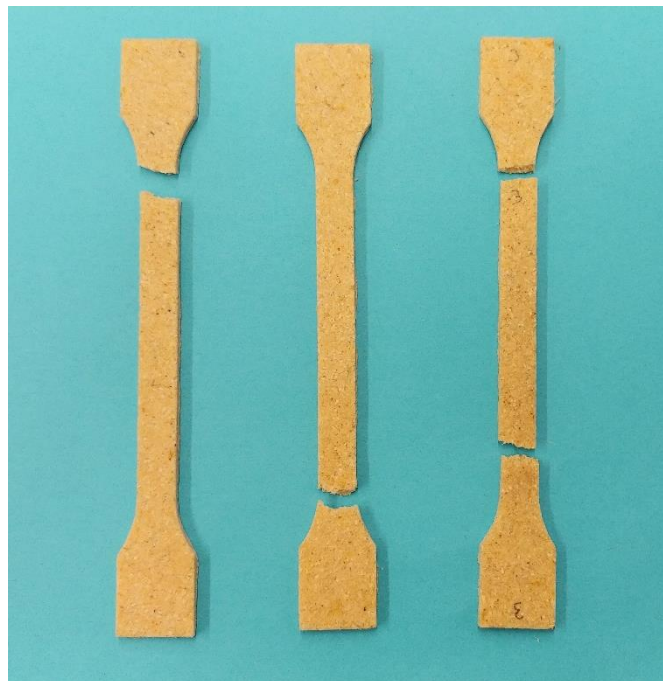

**Figure S6.** The 3 Cg1-1F samples after tensile testing.

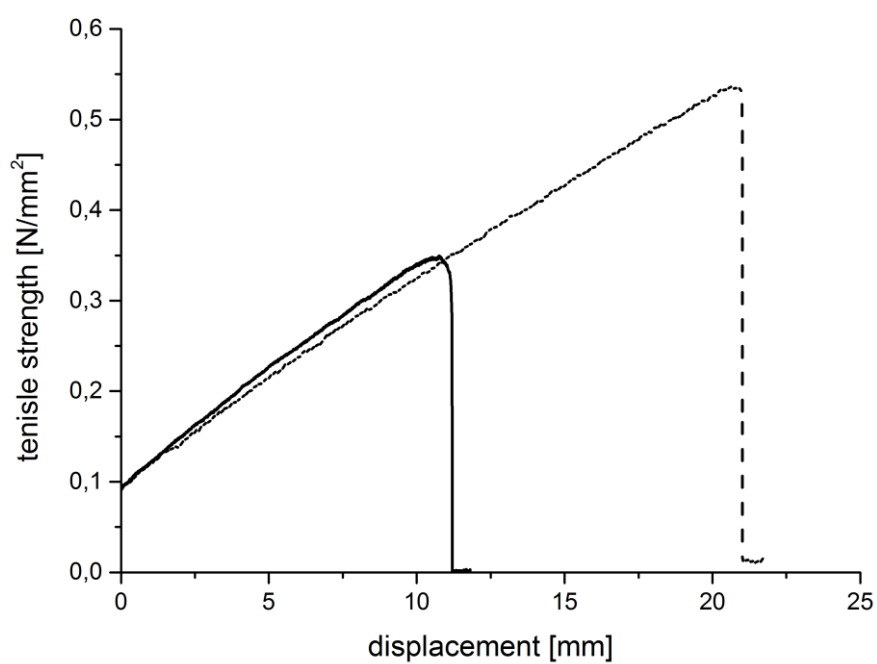

**Figure S7.** Tensile test of the Gg1-1 mixture. The sample appearance is shown in Figure S5, leftmost sample.

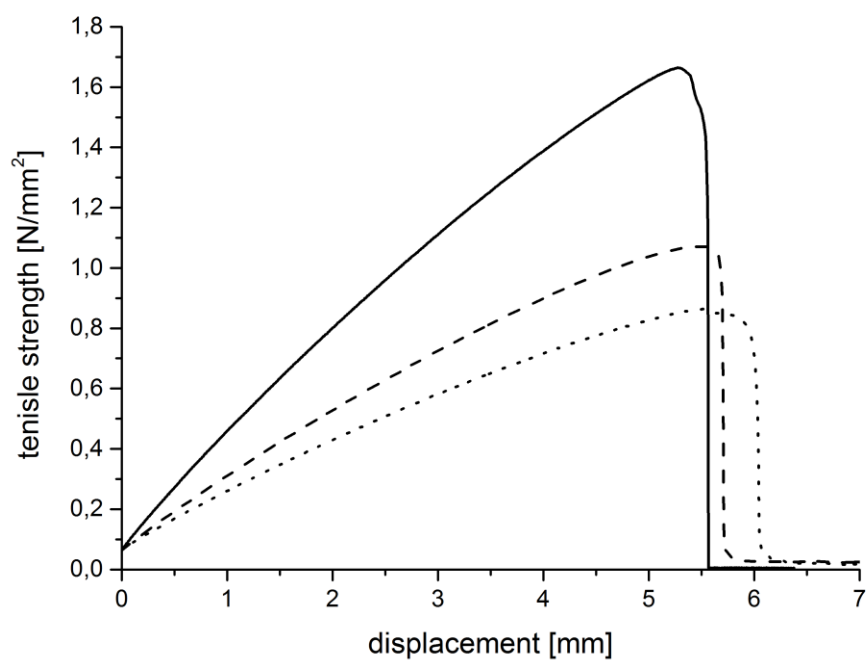

**Figure S8.** Tensile test of the Gg1-1F mixture containing 20 wt% feather shreds. The sample appearance is shown in Figure S5, rightmost sample.

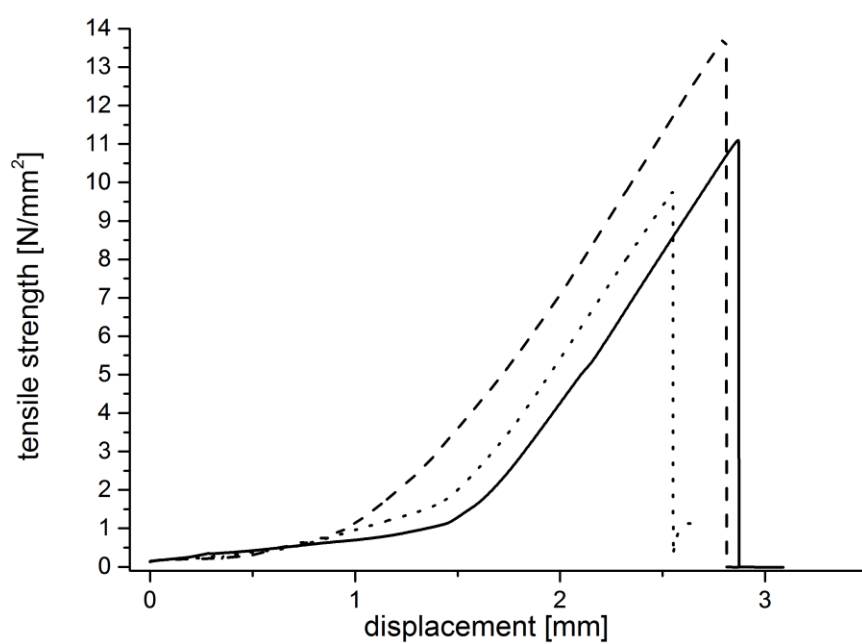

**Figure S9.** Tensile test of the Cg1-1F mixture containing 20 wt% feather shreds.

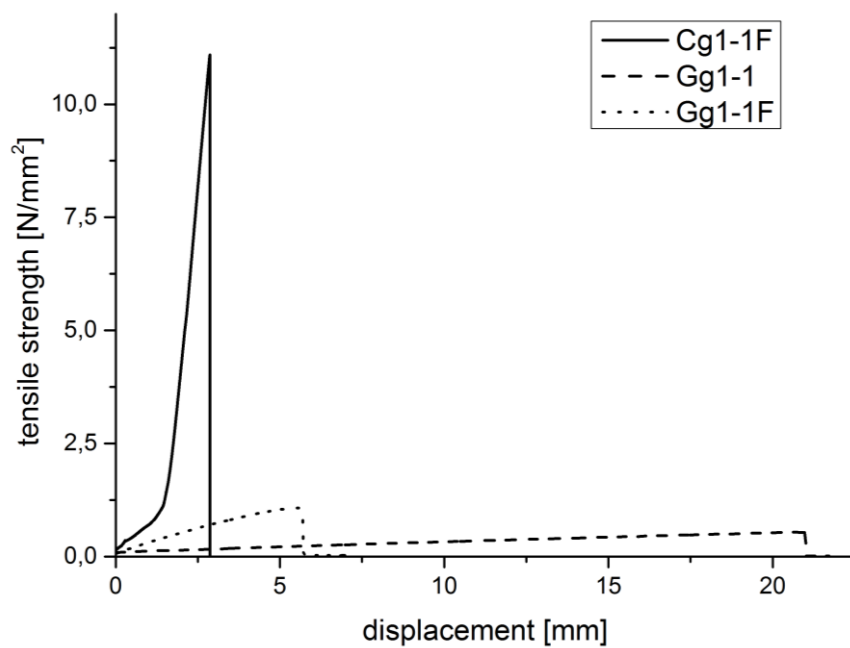

**Figure S10.** Comparison of the stress-strain curves for the mixtures listed in Table 2.

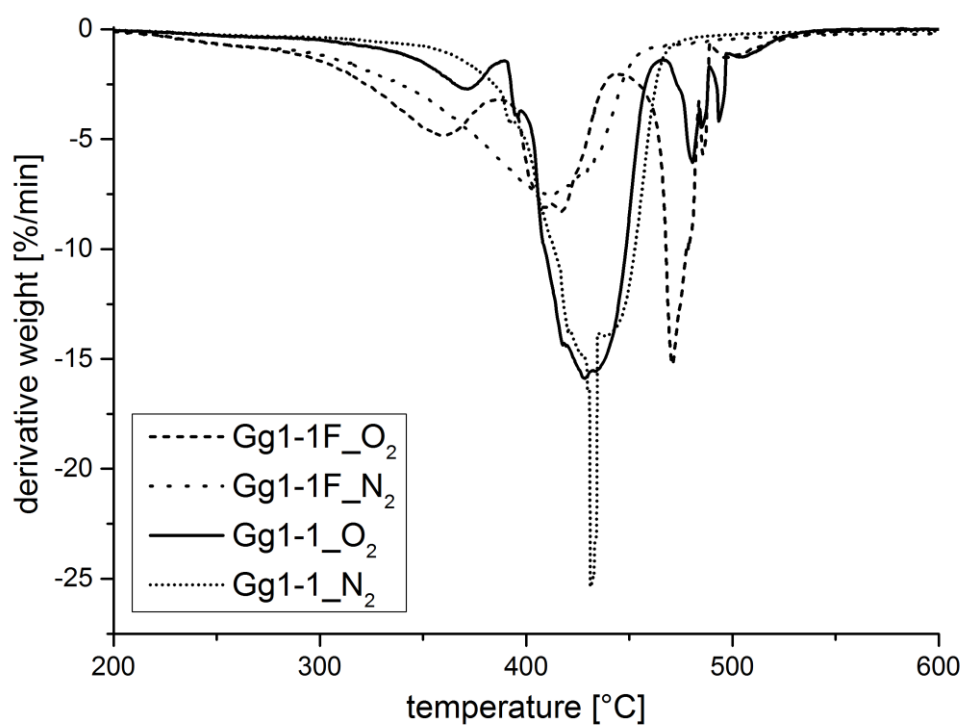

**Figure S11.** DTG curves of the Gg1-1 series.

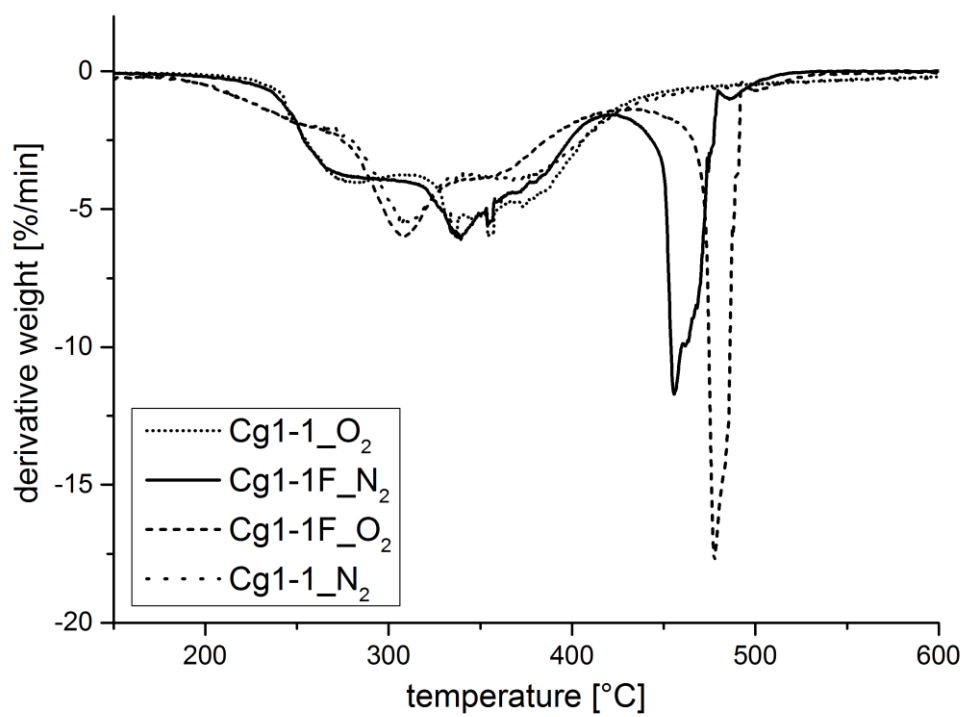

**Figure S12.** DTG curves of the Cg1-1 series.
